# Supplementary material
Source: publisher figshare collection journal article supplement (https://gsajournals.figshare.com/ndownloader/files/13273025)
Supplement: Supplementary file 1 [file 13273025]

## Sheet: Sheet1
Genotype	n size	Nuclear migration defect (%)	Sema1b protein in PFCs (%)	Sema1b protein in AFCs (%)
GR1>+	29	0	100	0
GR1>hop RNAi	33	0	0	0
GR1>λtop	36	0	86.1	100
TJ>+	53	0	100	0
TJ>MEK RNAi	37	21.6	73	0
Table S1. Quantification of Figure 3. RNAi knockdown of hop disrupts Sema1b-Venus enrichment in the PFCs. RNAi knockdown of MEK disrupts nuclear migration and also often causes a concomitant loss of Sema1b from the PFCs. This suggests that EGFR is strongly disrupted in these egg chambers. UAS-λtop expression produces ectopic Sema-1b accumulation in the anterior follicle cells (AFCs) and a modest …
